# Supplementary material
Source: publisher site journal article supplement (https://www.dovepress.com/article/422614)
Supplement: Supplementary file 1 [file get_supplementary_file.php]

Supplementary Analysis
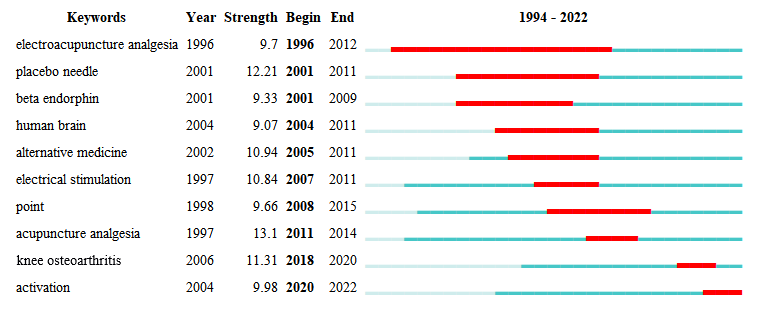


Supplementary Figure 1. Top 10 Keywords with the Strongest Bursts of Cluster 1.


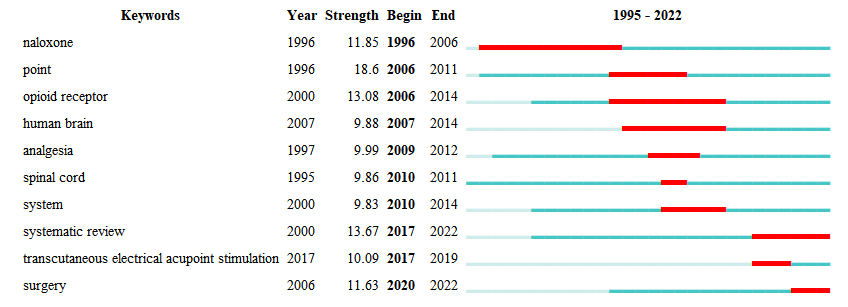


Supplementary Figure 2. Top 10 Keywords with the Strongest Bursts of Cluster 3.


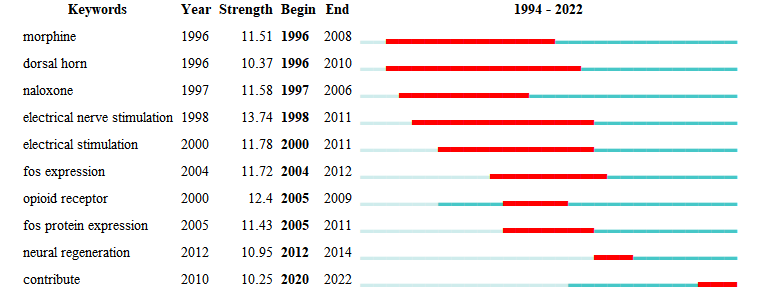


Supplementary Figure 3.Top 10 Keywords with the Strongest Bursts of Cluster 0.


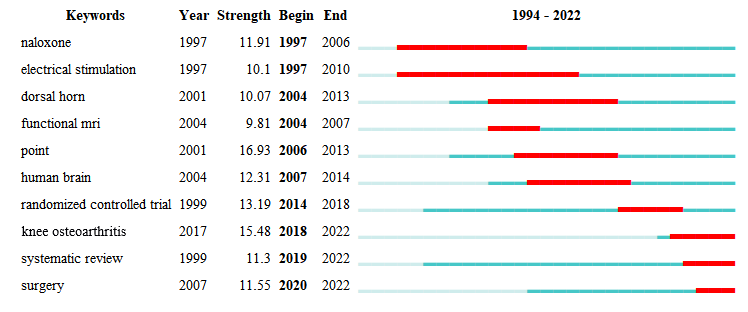


Supplementary Figure 4.Top 10 Keywords with the Strongest Bursts of Cluster 4.


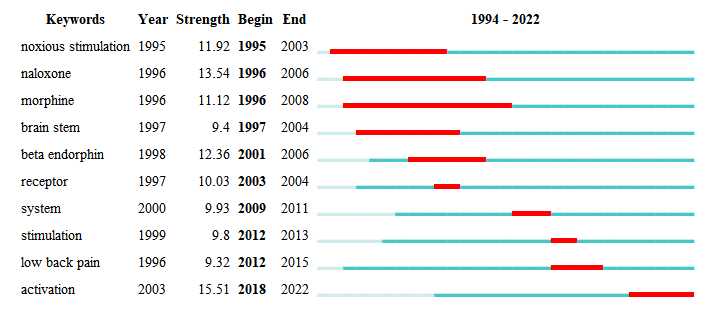


Supplementary Figure 5.Top 10 Keywords with the Strongest Bursts of Cluster 2.
